# Supplementary material
Source: PubMed Central journal article supplement (PMC8483649)

# THE LANCET

## Rheumatology

### Supplementary appendix

This appendix formed part of the original submission and has been peer reviewed.  
We post it as supplied by the authors.

Supplement to: Cavalli G, Colafrancesco S, De Luca G, et al. Cutaneous vasculitis following COVID-19 vaccination. *Lancet Rheumatol* 2021; published online Sept 30.  
[https://doi.org/10.1016/S2665-9913\(21\)00309-X](https://doi.org/10.1016/S2665-9913(21)00309-X).

**Supplementary Table 1.** Clinical features, lab findings, and therapies of all patients.

| <b>Sex, age (years)</b> | <b>Onset following vaccination</b> | <b>Cutaneous involvement</b>                | <b>Visceral involvement</b> | <b>Lab tests: CRP, ESR</b>  | <b>Lab tests: other *</b> | <b>Treatment (PDN-equivalent)</b>         |
|-------------------------|------------------------------------|---------------------------------------------|-----------------------------|-----------------------------|---------------------------|-------------------------------------------|
| M, 57                   | 14 days (1 <sup>st</sup> dose)     | Lower and upper limbs, abdomen, trunk, head | None                        | CRP 27 mg/dL<br>ESR 17 mm/h | Negative or normal        | 1 mg/Kg for 3 weeks, followed by tapering |
| M, 58                   | 7 days (2 <sup>nd</sup> dose)      | Lower limbs, abdomen, trunk                 | None                        | CRP 52 mg/L<br>ESR 79 mm/1h | Negative or normal        | 1 mg/Kg for 14 days, followed by tapering |
| F, 53                   | 6 days (1 <sup>st</sup> dose)      | Lower and upper limbs                       | None                        | CRP 7 mg/L<br>ESR 35 mm/1h  | Negative or normal        | 1 mg/Kg for 14 days, followed by tapering |

**Figure Legend.** CRP: C-reactive protein. ESR: erythrocyte sedimentation rate. \* Other lab tests included: ANCA, cANCA, pANCA, rheumatoid factor, cryoglobulins, anti-nuclear antibodies, anti-DNA antibodies, C3 and C4 complement fractions, cryoglobulins, IgA, and serology for HBV and HCV. PDN: prednisone.

**Supplementary Figure 1.** Cutaneous vasculitis, Patient 2

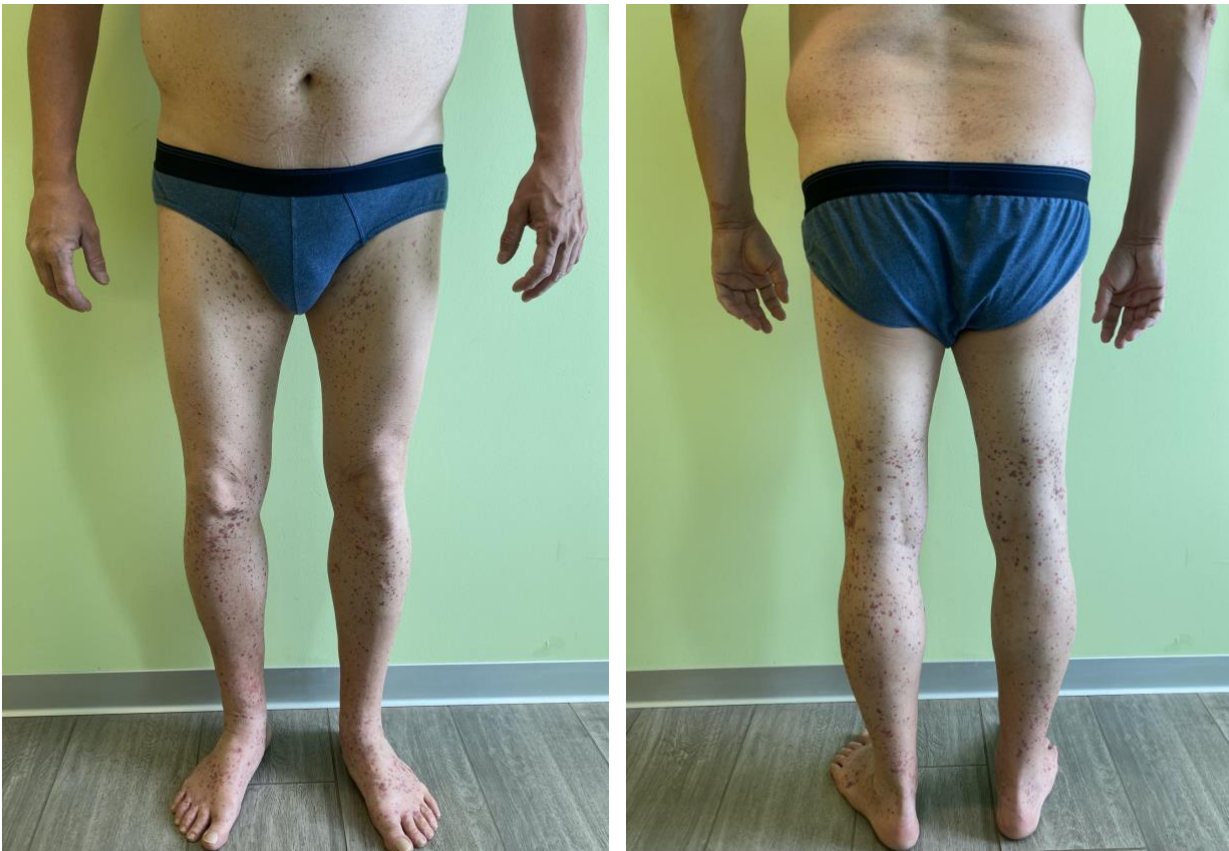

**Supplementary Figure 2.** Skin biopsy, Patient 3. Histologic evaluation of a 5 mm punch biopsy revealed a slight lymphocytic perivascular infiltrate. Hematoxylin and eosin, original magnification 200x.

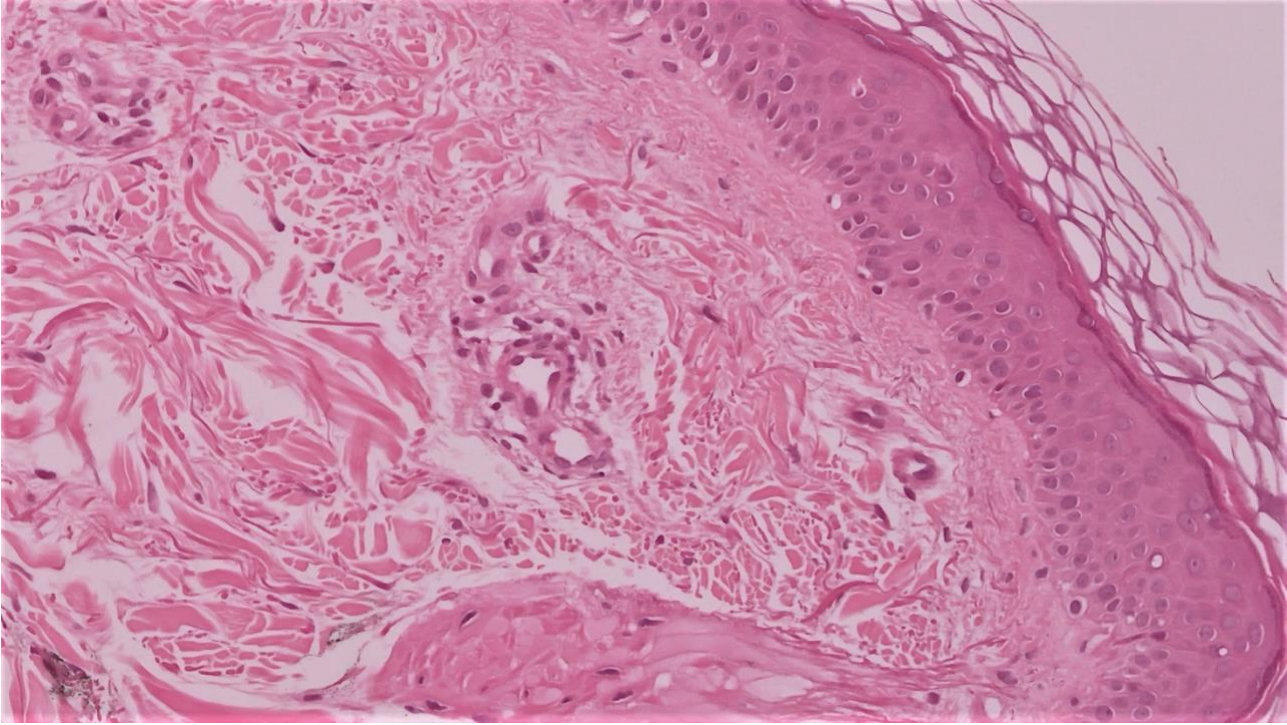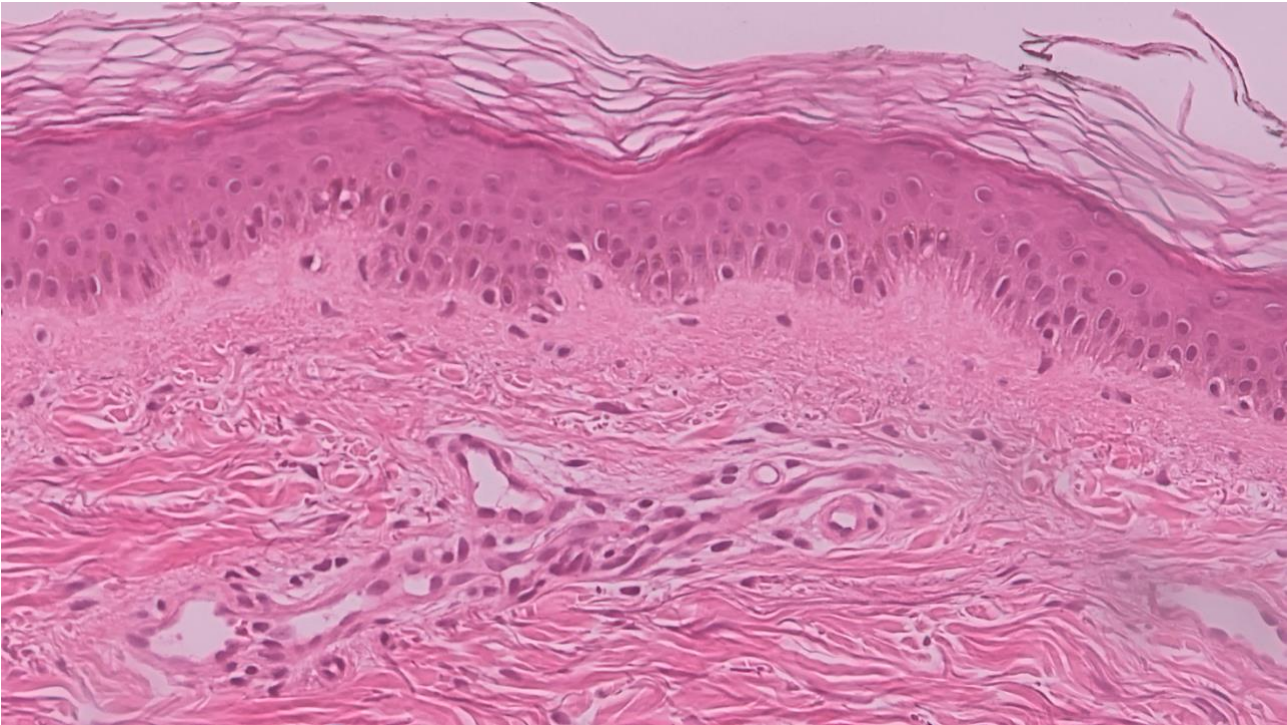

Supplement: mmc1.pdf [file mmc1.pdf]
